# Supplementary material
Source: Royal Society of Chemistry journal article supplement (doi:10.1039/d5cy01399b)
Supplement: d5cy01399b1.pdf [file d5cy01399b1.pdf]

**Redox–Acid Cooperative Bifunctional Catalyst comprising Dilacunary Phosphotungstates  
and Zeolite H $\beta$  for the synthesis of n-butyl levulinate and succinic acid**

Anjali Patel<sup>a\*</sup>, Margi Joshi<sup>a</sup>

<sup>a</sup>*Polyoxometalates and Catalysis Laboratory, Department of Chemistry, Faculty of Science,  
The Maharaja Sayajirao University of Baroda. Vadodara- 390020. Gujarat. India.*

\*E-mail: [anjali.patel-chem@msubaroda.ac.in](mailto:anjali.patel-chem@msubaroda.ac.in)

ORCID: 0000-0003-0177-3956\*

## Supplementary Information

### Text

#### **2.3.1 Acidity measurements**

a) Total acidity by n-butylamine titration. In this method, a 0.025 M solution of n-butylamine in Toluene as well as 0.025 M Trichloroacetic acid (TCA) in Toluene was prepared. The 0.25 g material was allowed for suspension in 25 mL n-butylamine solution for 24 h and the excess base was titrated against Trichloroacetic acid using neutral red as an indicator. Total acidity was calculated by given formula:

Acidity (mmol/gm) = mole/ gm = gm of n-BA/molecular weight of n-BA

b) The total acidic sites as well as types of acidic sites were determined by potentiometric titration. In which, a suspension of 0.25 g of material was prepared in 25 mL of Acetonitrile and put in for stirring for about 12–15 min and initial electrode potential was measured (which indicates its acidic strength). A 0.05 N n-Butylamine (n-BA) solution in Acetonitrile (0.1 mL) was added to this suspension and allowed to stir for 3 h at 25°C. Then potentiometrically, it was titrated against the same solution of n-Butylamine and the variation in electrode potential was noted with a digital pH meter. The acidic sites were calculated according to the following scale:  $E_i > 100$  mV (very strong sites),  $0 < E_i < 100$  mV (strong sites),  $-100 < E_i < 0$  mV (weak sites) and  $E_i < -100$  mV (very weak sites)

c) The  $\text{NH}_3$  temperature-programmed desorption ( $\text{NH}_3$ -TPD) was conducted using the BELCAT-II equipment manufactured by MicrotracBEL Corp. (Japan). In the presence of a pure helium gas mixture (99.9%, flowing at a rate of 30 mL per minute), a dry catalyst weighing 0.05 g was loaded and subjected to a pre-treatment process at a temperature of 300 °C for a duration of 1 hour. A 10%  $\text{NH}_3$  in He gas mixture was used to adsorb ammonia onto the surface of the substance for a duration of 1 hour. Subsequently, the physisorbed ammonia was eliminated by flushing the material with pure He gas. The temperature programming procedure was a gradual increase in temperature from 100 to 600 °C, with a rate of 10 °C per minute. The emitted  $\text{NH}_3$  was then monitored using a thermal conductivity detector (TCD) incorporated in the experimental setup.

### **2.3.2 Physicochemical techniques**

Cyclic Voltammetric studies were performed on the CHI 660A instrument. The BET (Brunauer–Emmett–Teller) surface area measurements as well as the  $\text{N}_2$  adsorption-desorption isotherms (at 77 K) were recorded using Micromeritics ASAP 2010 (USA) volumetric static adsorption instrument. By using the BJH adsorption-desorption method, pore size distributions were calculated. For the elemental analysis, the JSM-7100F EDX-SEM analyser was used. The Mettler Toledo Star SW 7.01 was used under the nitrogen atmosphere for thermogravimetric analysis (TGA) with a flow rate of 2 mL  $\text{min}^{-1}$  at 25–600 °C (ramp rate of 10 °C  $\text{min}^{-1}$ ). The Fourier Transform Infrared (FT-IR) spectra were recorded in the range 4000–400  $\text{cm}^{-1}$  by using a KBr disc on a Shimadzu instrument (IRAffinity-1S). The Powder X-ray diffraction (XRD) patterns for the samples were recorded using a Philips PW-1830 instrument in the  $2\theta$  range 5 - 90° (Cu  $\text{K}\alpha$  radiation  $\lambda = 1.54 \text{ \AA}$ ). The solid-state  $^{29}\text{Si}$  MAS NMR spectra were recorded on JOEL ECX 400 MHz High resolution multinuclear FT-NMR spectrometer. Transmission electron microscopy (TEM) was done by coating the samples on the Cu grid and scanned on a JEOL TEM instrument (model-JEM 2100) (JAPAN) with an acceleration voltage of 200 kV using carbon-coated 200 mesh.

## Figures

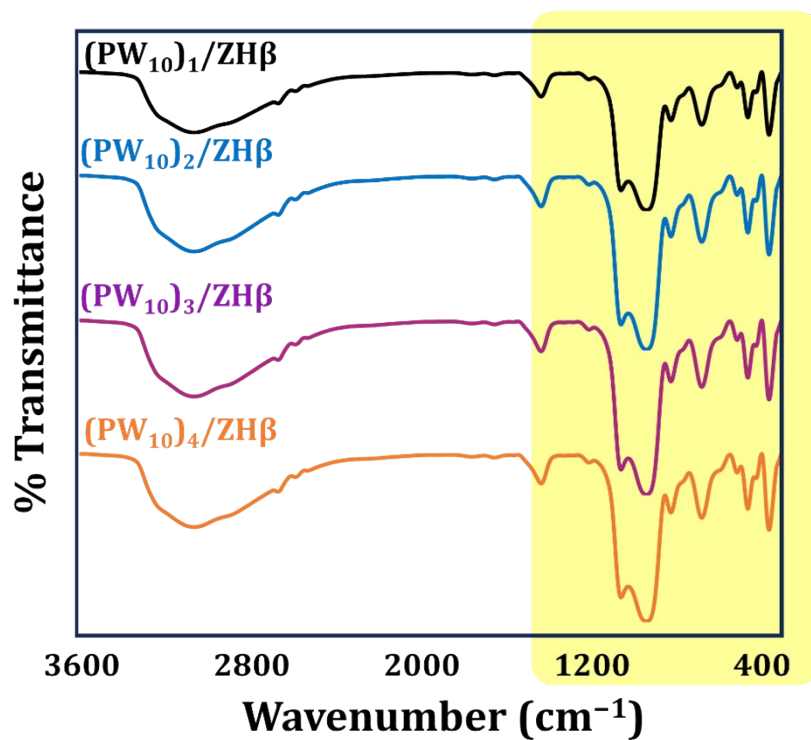

Supplementary Figure 1. FT-IR spectra of catalysts

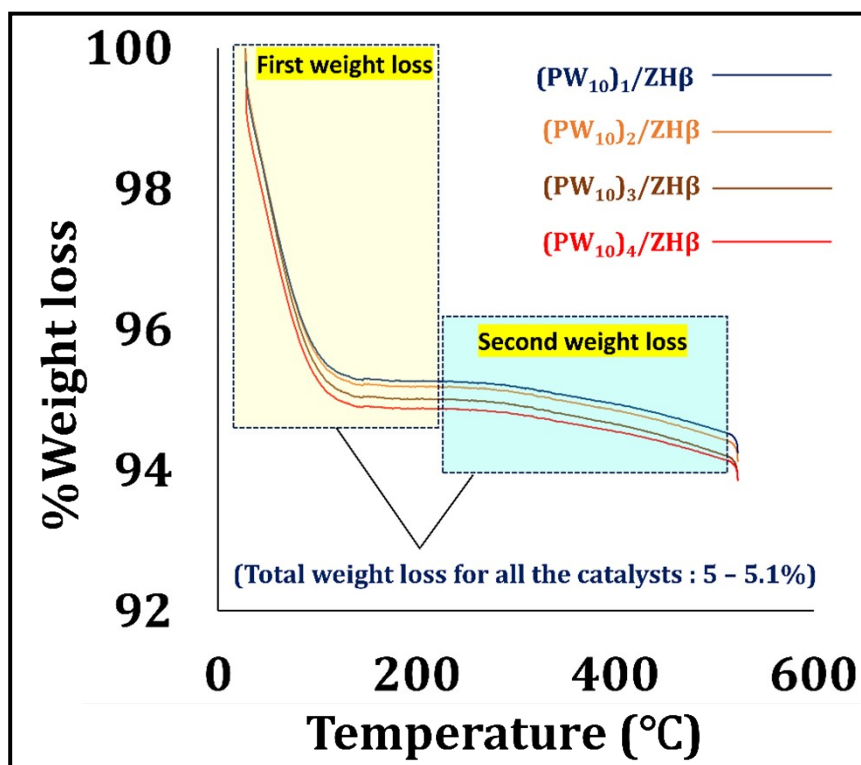

Supplementary Figure 2. TGA of catalysts

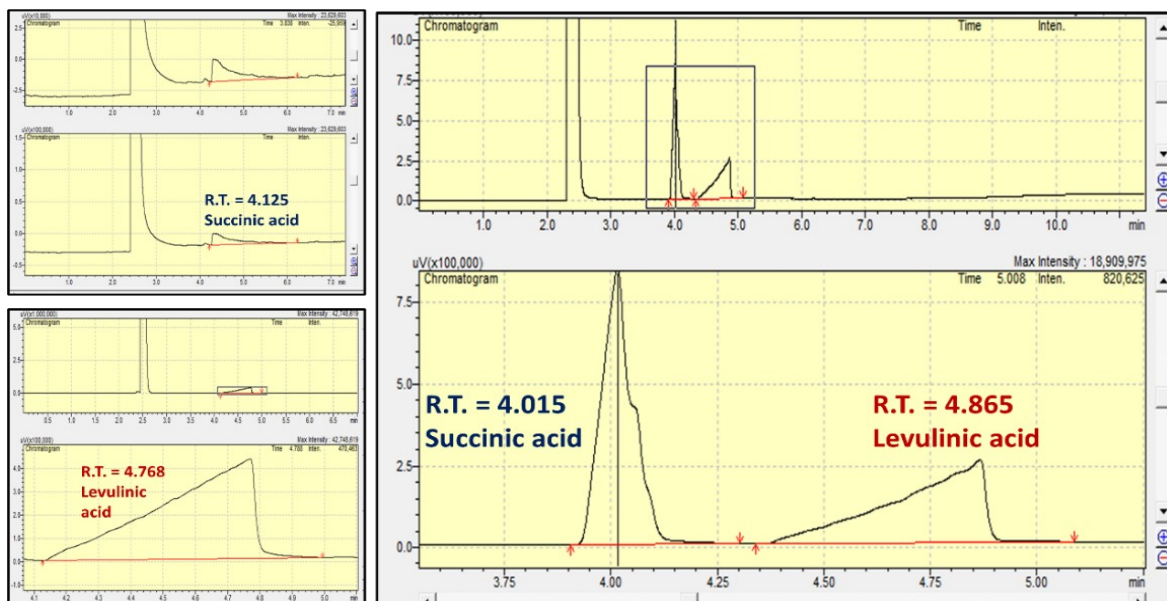

Supplementary Figure 3. GC of standards and the reaction mixture

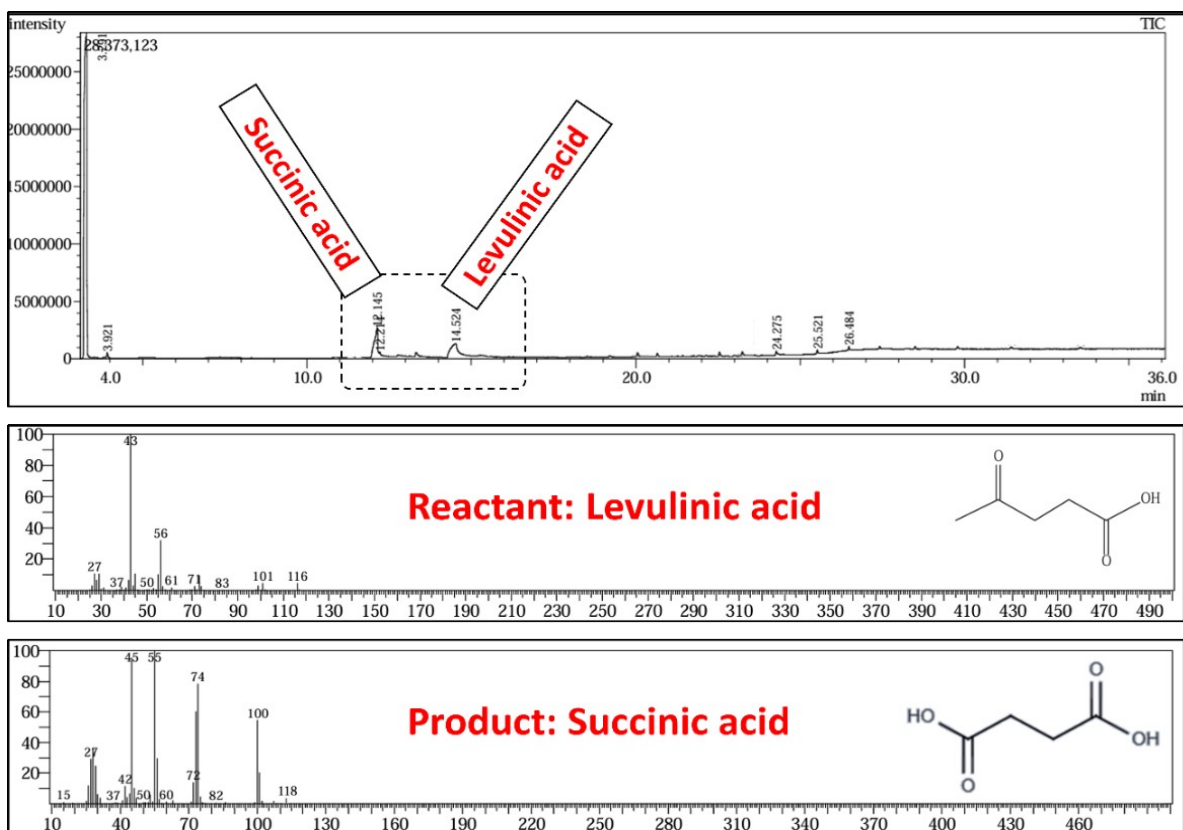

Supplementary Figure 4. GC-MS profile of reaction mixture
